# Supplementary material for: Impact of heparin and short term anesthesia on the quantification of cytokines in laboratory mouse plasma
Source: PubMed Central journal article supplement (PMC4041355; doi:10.1186/1751-0147-56-33), 2014-05-20
Supplement: 1751-0147-56-33-S1.pdf [file 1751-0147-56-33-S1.pdf]

**Additional file 1 - Raw data for Experiment 1**

The table shows the raw data from unanesthetized control mice ("NO\_ANE", n = 6) and anesthetized mice ("ANE", n = 7). Shown are the mean concentrations in pg/ml (Mean), the coefficient of variation (%CV) and the standard error of the mean (SEM) for each of the 23 cytokines measured in the types of samples: serum (Serum), heparin-plasma (Heparin), EDTA-plasma (EDTA) in Experiment 1. OOR < states out of range below the standard curve.

|                                |             | Experiment 1 |         |      |       |         |      |
|--------------------------------|-------------|--------------|---------|------|-------|---------|------|
| (pg/ml)                        |             | NO_ANE       |         |      | ANE   |         |      |
| Cytokine                       |             | Serum        | Heparin | EDTA | Serum | Heparin | EDTA |
| <b>IL-1<math>\alpha</math></b> | <b>Mean</b> | 0.09         | 0.15    | 0.21 | 0.07  | 0.10    | 0.08 |
|                                | <b>%CV</b>  | 15.9         | 18.7    | 30.4 | 13.3  | 9.77    | 21.3 |
|                                | <b>SEM</b>  | 0.02         | 0.05    | 0.06 | 0.02  | 0.03    | 0.02 |
| <b>IL-1<math>\beta</math></b>  | <b>Mean</b> | 0.06         | 0.17    | 0.08 | 0.07  | 0.08    | 0.10 |
|                                | <b>%CV</b>  | 4.19         | 19.9    | 9.73 | 9.96  | 10.1    | 7.31 |
|                                | <b>SEM</b>  | 0.01         | 0.10    | 0.01 | 0.01  | 0.01    | 0.02 |
| <b>IL-2</b>                    | <b>Mean</b> | 0.05         | 0.08    | 0.05 | 0.05  | 0.06    | 0.05 |
|                                | <b>%CV</b>  | 11.9         | 29.2    | 14.9 | 11.7  | 20.9    | 8.10 |
|                                | <b>SEM</b>  | 0.00         | 0.01    | 0.01 | 0.00  | 0.01    | 0.00 |
| <b>IL-3</b>                    | <b>Mean</b> | OOR<         | OOR<    | OOR< | OOR<  | OOR<    | OOR< |
|                                | <b>%CV</b>  | -            | -       | -    | -     | -       | -    |
|                                | <b>SEM</b>  | -            | -       | -    | -     | -       | -    |
| <b>IL-4</b>                    | <b>Mean</b> | OOR<         | OOR<    | OOR< | OOR<  | OOR<    | OOR< |
|                                | <b>%CV</b>  | -            | -       | -    | -     | -       | -    |
|                                | <b>SEM</b>  | -            | -       | -    | -     | -       | -    |
| <b>IL-5</b>                    | <b>Mean</b> | OOR<         | OOR<    | OOR< | OOR<  | OOR<    | OOR< |
|                                | <b>%CV</b>  | -            | -       | -    | -     | -       | -    |
|                                | <b>SEM</b>  | -            | -       | -    | -     | -       | -    |
| <b>IL-6</b>                    | <b>Mean</b> | 0.02         | 0.03    | 0.02 | 0.01  | 0.02    | 0.02 |
|                                | <b>%CV</b>  | 5.45         | 17.6    | 19.8 | 8.96  | 6.32    | 6.05 |
|                                | <b>SEM</b>  | 0.00         | 0.00    | 0.00 | 0.00  | 0.00    | 0.00 |
| <b>IL-9</b>                    | <b>Mean</b> | 0.03         | 0.04    | 0.05 | 0.06  | 0.03    | 0.05 |
|                                | <b>%CV</b>  | 5.28         | 12.1    | 6.09 | 19.6  | 7.07    | 9.84 |
|                                | <b>SEM</b>  | 0.01         | 0.01    | 0.03 | 0.03  | 0.01    | 0.01 |
| <b>IL-10</b>                   | <b>Mean</b> | OOR<         | OOR<    | OOR< | OOR<  | OOR<    | OOR< |
|                                | <b>%CV</b>  | -            | -       | -    | -     | -       | -    |
|                                | <b>SEM</b>  | -            | -       | -    | -     | -       | -    |
| <b>IL-12p40</b>                | <b>Mean</b> | 0.41         | 0.24    | 0.27 | 0.20  | 0.17    | 0.24 |
|                                | <b>%CV</b>  | 6.19         | 14.3    | 5.02 | 6.24  | 2.45    | 8.11 |
|                                | <b>SEM</b>  | 0.11         | 0.02    | 0.06 | 0.03  | 0.03    | 0.05 |
| <b>IL-12p70</b>                | <b>Mean</b> | 0.03         | 0.04    | 0.04 | 0.03  | 0.02    | 0.03 |
|                                | <b>%CV</b>  | 13.4         | 20.3    | 14.8 | 17.2  | 14.5    | 16.2 |
|                                | <b>SEM</b>  | 0.00         | 0.01    | 0.00 | 0.01  | 0.00    | 0.01 |
| <b>IL-13</b>                   | <b>Mean</b> | 0.06         | 0.08    | 0.12 | 0.11  | 0.05    | 0.09 |
|                                | <b>%CV</b>  | 9.74         | 13.7    | 7.27 | 10.7  | 7.53    | 10.6 |
|                                | <b>SEM</b>  | 0.03         | 0.02    | 0.05 | 0.07  | 0.01    | 0.03 |
| <b>IL-17A</b>                  | <b>Mean</b> | 0.03         | 0.02    | 0.04 | 0.04  | 0.02    | 0.02 |
|                                | <b>%CV</b>  | 5.59         | 12.1    | 13.3 | 10.4  | 10.8    | 6.95 |
|                                | <b>SEM</b>  | 0.01         | 0.01    | 0.02 | 0.02  | 0.00    | 0.01 |

|                                 |             |      |      |      |      |      |      |
|---------------------------------|-------------|------|------|------|------|------|------|
| <b>Eotaxin</b>                  | <b>Mean</b> | 0.23 | 0.22 | 0.22 | 0.11 | 0.13 | 0.11 |
|                                 | <b>%CV</b>  | -    | -    | -    | -    | -    | -    |
|                                 | <b>SEM</b>  | -    | -    | -    | -    | -    | -    |
| <b>G-CSF</b>                    | <b>Mean</b> | 0.23 | 0.22 | 0.22 | 0.11 | 0.13 | 0.11 |
|                                 | <b>%CV</b>  | 13.1 | 23.1 | 11.9 | 11.1 | 7.96 | 14.7 |
|                                 | <b>SEM</b>  | 0.06 | 0.04 | 0.07 | 0.01 | 0.01 | 0.01 |
| <b>GM-CSF</b>                   | <b>Mean</b> | 0.14 | 0.24 | 0.17 | 0.16 | 0.19 | 0.18 |
|                                 | <b>%CV</b>  | 7.72 | 19.3 | 29.8 | 12.4 | 11.8 | 9.51 |
|                                 | <b>SEM</b>  | 0.01 | 0.04 | 0.02 | 0.02 | 0.02 | 0.04 |
| <b>IFN-<math>\gamma</math></b>  | <b>Mean</b> | 0.03 | 0.05 | 0.04 | 0.05 | 0.04 | 0.04 |
|                                 | <b>%CV</b>  | 6.96 | 16.9 | 20.8 | 13.9 | 11.4 | 7.33 |
|                                 | <b>SEM</b>  | 0.00 | 0.01 | 0.00 | 0.00 | 0.01 | 0.00 |
| <b>KC</b>                       | <b>Mean</b> | 0.07 | 0.04 | 0.13 | 0.02 | 0.05 | 0.17 |
|                                 | <b>%CV</b>  | 17.4 | 18.5 | 13.9 | 10.8 | 7.28 | 17.1 |
|                                 | <b>SEM</b>  | 0.04 | 0.01 | 0.05 | 0.01 | 0.01 | 0.05 |
| <b>MCP-1</b>                    | <b>Mean</b> | 0.07 | 0.10 | 0.17 | 0.08 | 0.08 | 0.09 |
|                                 | <b>%CV</b>  | 6.45 | 8.61 | 10.8 | 9.31 | 6.07 | 4.88 |
|                                 | <b>SEM</b>  | 0.02 | 0.04 | 0.10 | 0.02 | 0.02 | 0.02 |
| <b>MIP-1<math>\alpha</math></b> | <b>Mean</b> | 0.06 | 0.09 | 0.08 | 0.08 | 0.08 | 0.07 |
|                                 | <b>%CV</b>  | 6.04 | 17.8 | 18.2 | 8.90 | 6.56 | 9.02 |
|                                 | <b>SEM</b>  | 0.01 | 0.01 | 0.01 | 0.01 | 0.01 | 0.01 |
| <b>MIP-1<math>\beta</math></b>  | <b>Mean</b> | 0.02 | 0.04 | 0.03 | 0.03 | 0.02 | 0.02 |
|                                 | <b>%CV</b>  | 5.02 | 11.9 | 10.6 | 15.1 | 5.07 | 6.73 |
|                                 | <b>SEM</b>  | 0.00 | 0.01 | 0.01 | 0.01 | 0.01 | 0.00 |
| <b>RANTES</b>                   | <b>Mean</b> | 0.04 | 0.05 | 0.11 | 0.04 | 0.09 | 0.11 |
|                                 | <b>%CV</b>  | 12.8 | 19.8 | 36.0 | 21.0 | 9.38 | 22.9 |
|                                 | <b>SEM</b>  | 0.01 | 0.01 | 0.05 | 0.02 | 0.04 | 0.03 |
| <b>TNF-<math>\alpha</math></b>  | <b>Mean</b> | 0.11 | 0.12 | 0.13 | 0.15 | 0.10 | 0.11 |
|                                 | <b>%CV</b>  | 5.21 | 13.1 | 9.71 | 10.8 | 8.64 | 5.22 |
|                                 | <b>SEM</b>  | 0.01 | 0.02 | 0.02 | 0.05 | 0.02 | 0.01 |
