# Supplementary material for: Impact of heparin and short term anesthesia on the quantification of cytokines in laboratory mouse plasma
Source: PubMed Central journal article supplement (PMC4041355; doi:10.1186/1751-0147-56-33), 2014-05-20
Supplement: 1751-0147-56-33-S2.pdf [file 1751-0147-56-33-S2.pdf]

**Additional file 2 - Raw data for Experiment 2**

The table shows the raw data from the ten mice (n = 10) in Experiment 2. Shown are the mean concentrations in pg/ml (Mean), the coefficient of variation (%CV) and the standard error of the mean (SEM) for each of the 23 cytokines measured in the types of samples: serum (Serum), EDTA-plasma (EDTA) and the heparin-coated tubes that were either non-spiked ("Hep"), spiked with 1 µl ("Hep1") or 10 µl ("Hep10") of 5,000 IU/ml heparin in Experiment 2. OOR> states out of range above the standard curve.

| Experiment 2    |             |                        |                        |                        |                        |                        |
|-----------------|-------------|------------------------|------------------------|------------------------|------------------------|------------------------|
| Cytokine        |             | Serum                  | Hep                    | Hep1                   | Hep10                  | EDTA                   |
| <b>IL-1α</b>    | <b>Mean</b> | 80.5 × 10 <sup>2</sup> | 80.4 × 10 <sup>2</sup> | 56.4 × 10 <sup>2</sup> | 91.1 × 10 <sup>2</sup> | 91.0 × 10 <sup>3</sup> |
|                 | <b>%CV</b>  | 11.6                   | 5.75                   | 5.85                   | 27.5                   | 9.76                   |
|                 | <b>SEM</b>  | 782                    | 11.9 × 10 <sup>2</sup> | 13.8 × 10 <sup>2</sup> | 946                    | 23.7 × 10 <sup>2</sup> |
| <b>IL-1β</b>    | <b>Mean</b> | 60.9 × 10 <sup>3</sup> | 66.7 × 10 <sup>3</sup> | 98.4 × 10 <sup>3</sup> | 48.7 × 10 <sup>3</sup> | 87.5 × 10 <sup>3</sup> |
|                 | <b>%CV</b>  | 3.54                   | 2.49                   | 4.00                   | 3.91                   | 11.7                   |
|                 | <b>SEM</b>  | 15.2 × 10 <sup>2</sup> | 42.1 × 10 <sup>3</sup> | 25.7 × 10 <sup>3</sup> | 46.2 × 10 <sup>2</sup> | 20.4 × 10 <sup>3</sup> |
| <b>IL-2</b>     | <b>Mean</b> | 42.0 × 10 <sup>3</sup> | 40.3 × 10 <sup>3</sup> | 52.1 × 10 <sup>3</sup> | 45.8 × 10 <sup>3</sup> | 49.8 × 10 <sup>3</sup> |
|                 | <b>%CV</b>  | 8.17                   | 4.16                   | 4.05                   | 2.10                   | 9.61                   |
|                 | <b>SEM</b>  | 49.3 × 10 <sup>2</sup> | 62.8 × 10 <sup>2</sup> | 14.0 × 10 <sup>3</sup> | 41.0 × 10 <sup>2</sup> | 11.7 × 10 <sup>3</sup> |
| <b>IL-3</b>     | <b>Mean</b> | 90.0 × 10 <sup>2</sup> | 97.8 × 10 <sup>2</sup> | 15.3 × 10 <sup>3</sup> | 13.9 × 10 <sup>3</sup> | 19.6 × 10 <sup>3</sup> |
|                 | <b>%CV</b>  | 7.11                   | 5.07                   | 7.07                   | 1.92                   | 6.09                   |
|                 | <b>SEM</b>  | 13.7 × 10 <sup>2</sup> | 17.3 × 10 <sup>2</sup> | 46.1 × 10 <sup>2</sup> | 13.0 × 10 <sup>3</sup> | 11.0 × 10 <sup>2</sup> |
| <b>IL-4</b>     | <b>Mean</b> | OOR>                   | OOR>                   | OOR>                   | OOR>                   | OOR>                   |
|                 | <b>%CV</b>  | -                      | -                      | -                      | -                      | -                      |
|                 | <b>SEM</b>  | -                      | -                      | -                      | -                      | -                      |
| <b>IL-5</b>     | <b>Mean</b> | OOR>                   | OOR>                   | OOR>                   | OOR>                   | OOR>                   |
|                 | <b>%CV</b>  | -                      | -                      | -                      | -                      | -                      |
|                 | <b>SEM</b>  | -                      | -                      | -                      | -                      | -                      |
| <b>IL-6</b>     | <b>Mean</b> | 68.6 × 10 <sup>2</sup> | 74.5 × 10 <sup>2</sup> | 12.7 × 10 <sup>3</sup> | 81.6 × 10 <sup>2</sup> | 96.1 × 10 <sup>2</sup> |
|                 | <b>%CV</b>  | 2.40                   | 2.59                   | 4.29                   | 2.71                   | 9.33                   |
|                 | <b>SEM</b>  | 299                    | 717                    | 29.4 × 10 <sup>2</sup> | 456                    | 16.1 × 10 <sup>2</sup> |
| <b>IL-9</b>     | <b>Mean</b> | 74.9 × 10 <sup>2</sup> | 38.9 × 10 <sup>2</sup> | 53.6 × 10 <sup>2</sup> | 21.0 × 10 <sup>2</sup> | 36.7 × 10 <sup>2</sup> |
|                 | <b>%CV</b>  | 5.82                   | 25.7                   | 13.3                   | 22.6                   | 29.8                   |
|                 | <b>SEM</b>  | 11.4 × 10 <sup>2</sup> | 856                    | 28.5 × 10 <sup>3</sup> | 110                    | 869                    |
| <b>IL-10</b>    | <b>Mean</b> | 72.5 × 10 <sup>2</sup> | 52.1 × 10 <sup>2</sup> | 77.7 × 10 <sup>2</sup> | 36.2 × 10 <sup>2</sup> | 14.9 × 10 <sup>3</sup> |
|                 | <b>%CV</b>  | 7.31                   | 4.57                   | 8.05                   | 3.16                   | 8.15                   |
|                 | <b>SEM</b>  | 410                    | 278                    | 21.4 × 10 <sup>2</sup> | 395                    | 26.1 × 10 <sup>2</sup> |
| <b>IL-12p40</b> | <b>Mean</b> | 12.5 × 10 <sup>3</sup> | 38.2 × 10 <sup>2</sup> | 52.1 × 10 <sup>2</sup> | 30.9 × 10 <sup>2</sup> | 16.0 × 10 <sup>3</sup> |
|                 | <b>%CV</b>  | 7.55                   | 6.10                   | 6.28                   | 5.65                   | 4.67                   |
|                 | <b>SEM</b>  | 812                    | 193                    | 14.3 × 10 <sup>2</sup> | 342                    | 28.1 × 10 <sup>2</sup> |
| <b>IL-12p70</b> | <b>Mean</b> | 18.6 × 10 <sup>3</sup> | 11.8 × 10 <sup>3</sup> | 13.6 × 10 <sup>3</sup> | 57.6 × 10 <sup>2</sup> | 27.4 × 10 <sup>3</sup> |
|                 | <b>%CV</b>  | 9.45                   | 17.3                   | 11.8                   | 10.5                   | 2.15                   |
|                 | <b>SEM</b>  | 13.6 × 10 <sup>2</sup> | 11.8 × 10 <sup>2</sup> | 32.8 × 10 <sup>2</sup> | 682                    | 47.2 × 10 <sup>2</sup> |
| <b>IL-13</b>    | <b>Mean</b> | 16.7 × 10 <sup>3</sup> | 18.2 × 10 <sup>3</sup> | 30.9 × 10 <sup>3</sup> | 16.8 × 10 <sup>3</sup> | 29.5 × 10 <sup>3</sup> |
|                 | <b>%CV</b>  | 8.85                   | 5.25                   | 7.28                   | 3.70                   | 10.5                   |
|                 | <b>SEM</b>  | 361                    | 14.1 × 10 <sup>2</sup> | 85.3 × 10 <sup>2</sup> | 16.2 × 10 <sup>2</sup> | 56.3 × 10 <sup>2</sup> |
| <b>IL-17A</b>   | <b>Mean</b> | 18.2 × 10 <sup>3</sup> | 10.7 × 10 <sup>3</sup> | 16.8 × 10 <sup>3</sup> | 93.5 × 10 <sup>2</sup> | 45.9 × 10 <sup>3</sup> |
|                 | <b>%CV</b>  | 5.05                   | 2.42                   | 9.51                   | 2.06                   | 8.19                   |
|                 | <b>SEM</b>  | 37.3 × 10 <sup>2</sup> | 13.4 × 10 <sup>2</sup> | 46.9 × 10 <sup>2</sup> | 640                    | 76.0 × 10 <sup>2</sup> |
| <b>Eotaxin</b>  | <b>Mean</b> | 17.8 × 10 <sup>3</sup> | 80.6 × 10 <sup>2</sup> | 12.5 × 10 <sup>3</sup> | 32.5 × 10 <sup>2</sup> | 16.5 × 10 <sup>3</sup> |

|                                 |             |                    |                    |                    |                    |                    |
|---------------------------------|-------------|--------------------|--------------------|--------------------|--------------------|--------------------|
|                                 | <b>%CV</b>  | 9.93               | 10.9               | 18.8               | 22.9               | 15.7               |
|                                 | <b>SEM</b>  | $23.1 \times 10^2$ | $14.9 \times 10^2$ | $43.3 \times 10^2$ | 552                | $28.9 \times 10^2$ |
| <b>G-CSF</b>                    | <b>Mean</b> | $13.2 \times 10^3$ | $18.7 \times 10^3$ | $32.3 \times 10^3$ | $20.4 \times 10^3$ | $24.5 \times 10^3$ |
|                                 | <b>%CV</b>  | 3.01               | 2.54               | 3.01               | 2.25               | 8.77               |
|                                 | <b>SEM</b>  | 682                | $11.1 \times 10^2$ | $92.5 \times 10^2$ | $15.8 \times 10^2$ | $54.1 \times 10^2$ |
| <b>GM-CSF</b>                   | <b>Mean</b> | 00R>               | 00R>               | 00R>               | 00R>               | 00R>               |
|                                 | <b>%CV</b>  | -                  | -                  | -                  | -                  | -                  |
|                                 | <b>SEM</b>  | -                  | -                  | -                  | -                  | -                  |
| <b>IFN-<math>\gamma</math></b>  | <b>Mean</b> | $11.0 \times 10^3$ | $13.3 \times 10^3$ | $21.2 \times 10^3$ | $14.1 \times 10^3$ | $20.9 \times 10^3$ |
|                                 | <b>%CV</b>  | 2.13               | 3.26               | 3.22               | 2.05               | 8.26               |
|                                 | <b>SEM</b>  | 640                | 898                | $64.3 \times 10^2$ | 737                | $46.7 \times 10^2$ |
| <b>KC</b>                       | <b>Mean</b> | $28.9 \times 10^3$ | 730                | 605                | 202                | $30.4 \times 10^3$ |
|                                 | <b>%CV</b>  | 1.00               | 7.51               | 8.16               | 7.39               | 9.29               |
|                                 | <b>SEM</b>  | $26.2 \times 10^2$ | 124                | 92.4               | 15.3               | $53.9 \times 10^2$ |
| <b>MCP-1</b>                    | <b>Mean</b> | $60.1 \times 10^2$ | $23.5 \times 10^2$ | $28.3 \times 10^2$ | $11.3 \times 10^2$ | $76.2 \times 10^2$ |
|                                 | <b>%CV</b>  | 5.28               | 9.19               | 10.7               | 5.25               | 7.64               |
|                                 | <b>SEM</b>  | 244                | 154                | 692                | 108                | $12.7 \times 10^2$ |
| <b>MIP-1<math>\alpha</math></b> | <b>Mean</b> | $13.3 \times 10^3$ | $10.8 \times 10^3$ | $11.3 \times 10^3$ | $99.8 \times 10^2$ | $18.8 \times 10^3$ |
|                                 | <b>%CV</b>  | 8.21               | 3.71               | 13.9               | 0.99               | 10.5               |
|                                 | <b>SEM</b>  | $13.9 \times 10^2$ | $14.7 \times 10^2$ | $36.3 \times 10^2$ | 672                | $32.5 \times 10^2$ |
| <b>MIP-1<math>\beta</math></b>  | <b>Mean</b> | $10.7 \times 10^3$ | $38.5 \times 10^2$ | $53.2 \times 10^2$ | $20.9 \times 10^2$ | $18.0 \times 10^3$ |
|                                 | <b>%CV</b>  | 12.2               | 4.76               | 10.6               | 5.11               | 10.3               |
|                                 | <b>SEM</b>  | $17.7 \times 10^2$ | 281.5              | $15.3 \times 10^2$ | 193                | $29.5 \times 10^2$ |
| <b>RANTES</b>                   | <b>Mean</b> | 872                | 451                | 498                | 200                | $18.8 \times 10^2$ |
|                                 | <b>%CV</b>  | 9.38               | 12.7               | 11.8               | 4.91               | 9.51               |
|                                 | <b>SEM</b>  | 131                | 56.4               | 117.2              | 11.7               | 377.8              |
| <b>TNF-<math>\alpha</math></b>  | <b>Mean</b> | $19.8 \times 10^3$ | $18.4 \times 10^3$ | $24.2 \times 10^3$ | $18.0 \times 10^3$ | $30.7 \times 10^3$ |
|                                 | <b>%CV</b>  | 7.71               | 5.60               | 5.71               | 4.60               | 7.17               |
|                                 | <b>SEM</b>  | $27.1 \times 10^3$ | $21.3 \times 10^2$ | $66.1 \times 10^2$ | $16.0 \times 10^2$ | $60.9 \times 10^2$ |
